# Supplementary material
Source: PubMed Central journal article supplement (PMC8084729)
Supplement: mmc1.pdf [file mmc1.pdf]

## **ISN-GKHA: Structures, organization and services for the management of kidney failure in North America and the Caribbean**

### **Supplementary Tables, Figures, and Appendix**

**Table S1:** Burden of chronic kidney disease and its risk factors in the North America and the Caribbean region.

**Figure S1:** Shortages of kidney failure providers in the North America and the Caribbean region.

**Figure S2:** Proportion of patients starting dialysis with different forms of vascular access and adequate education in the North America and the Caribbean region.

**Figure S3:** Availability of services to diagnose and treat complications of kidney failure in the North America and the Caribbean region.

**Figure S4:** Quality indicators monitored and reported by countries in the North America and the Caribbean region that participated in the ISN-GKHA survey.

**Figure S5:** Registry characteristics for countries in the North America and the Caribbean region that reported having one or more in the ISN-GKHA survey.

**Figure S6:** National strategies in the North America and the Caribbean region.

**Figure S7:** Populations covered by national non-communicable disease and chronic kidney disease strategies.

**Appendix:** Reference list for annual cost of kidney replacement therapy (for Table 1).

**Table S1:** Burden of chronic kidney disease and its risk factors in the North America and the Caribbean region.\*<sup>S1, S2</sup>

| Country                      | CKD Prevalence<br>% (95% CI) | Deaths attributed<br>to CKD<br>% (95% CI) | DALYs attributed<br>to CKD<br>% (95% CI) | Obesity<br>% (95% CI) | Increased BP<br>% (95% CI) | Smoking<br>% (95% CI) |
|------------------------------|------------------------------|-------------------------------------------|------------------------------------------|-----------------------|----------------------------|-----------------------|
| Global                       | 9.69 (9.25 - 10.14)          | 2.66 (2.42 - 2.90)                        | 1.68 (1.53 - 1.82)                       | 19.51 (17.88 - 21.13) | 24.43 (23.77 - 25.09)      | 14.02 (12.91 - 15.12) |
| North America                | 11.87 (10.83 - 12.92)        | 3.59 (3.13 - 4.05)                        | 2.60 (2.22 - 2.98)                       | 25.54 (21.18 - 29.90) | 21.81 (18.26 - 25.36)      | 8.38 (5.66 - 11.11)   |
| Antigua & Barbuda            | 10.79 (10.01 - 11.63)        | 4.61 (4.36 - 4.89)                        | 3.15 (2.83 - 3.47)                       | 19.10 (13.90 - 24.80) | 23.40 (16.60 - 31.10)      | 3.30 (2.50 - 4.50)    |
| Bahamas                      | 9.93 (9.23 - 10.71)          | 3.68 (3.47 - 3.88)                        | 2.62 (2.40 - 2.84)                       | 32.10 (26.10 - 38.50) | 20.90 (15.10 - 27.90)      | 6.10 (4.70 - 8.00)    |
| Barbados                     | 13.63 (12.65 - 14.72)        | 3.22 (3.03 - 3.42)                        | 2.60 (2.39 - 2.81)                       | 24.80 (19.80 - 30.20) | 24.40 (18.00 - 31.50)      | 4.20 (3.20 - 5.50)    |
| Bermuda                      | 13.86 (12.87 - 15.07)        | 3.09 (2.90 - 3.30)                        | 2.31 (2.09 - 2.52)                       | -                     | -                          | 9.00 (7.10 - 11.20)   |
| Canada                       | 10.25 (9.48 - 11.15)         | 2.18 (2.06 - 2.31)                        | 1.29 (1.18 - 1.40)                       | 31.30 (27.40 - 35.30) | 13.20 (9.40 - 17.70)       | 13.80 (12.00 - 15.90) |
| Cayman Islands               | -                            | -                                         | -                                        | -                     | -                          | -                     |
| Jamaica                      | 10.67 (9.91 - 11.49)         | 4.00 (3.63 - 4.32)                        | 2.89 (2.56 - 3.22)                       | 24.40 (19.90 - 29.20) | 21.80 (16.00 - 28.40)      | 9.40 (7.30 - 11.70)   |
| St. Kitts & Nevis            | -                            | -                                         | -                                        | 23.10 (17.70 - 29.10) | 25.30 (18.70 - 32.40)      | -                     |
| St. Lucia                    | 11.17 (10.38 - 12.01)        | 4.16 (3.87 - 4.43)                        | 3.04 (2.76 - 3.32)                       | 19.80 (14.90 - 25.10) | 27.10 (20.20 - 35.00)      | 8.00 (6.40 - 10.10)   |
| St. Vincent & the Grenadines | 11.65 (10.86 - 12.55)        | 3.64 (3.42 - 3.86)                        | 2.83 (2.58 - 3.06)                       | 23.80 (18.40 - 29.80) | 23.30 (17.00 - 30.50)      | 6.40 (5.00 - 8.00)    |
| Trinidad & Tobago            | 11.46 (10.62 - 12.45)        | 4.14 (3.91 - 4.41)                        | 2.93 (2.64 - 3.24)                       | 19.70 (14.50 - 25.70) | 25.80 (18.70 - 33.90)      | 14.60 (12.10 - 17.20) |
| Turks & Caicos               | -                            | -                                         | -                                        | -                     | -                          | -                     |
| United States                | 12.75 (11.87 - 13.78)        | 2.97 (2.93 - 3.02)                        | 1.90 (1.76 - 2.04)                       | 37.30 (33.40 - 41.30) | 12.90 (9.80 - 16.80)       | 13.30 (13.00 - 13.60) |
| Virgin Islands (U.S.)        | 14.44 (13.33 - 15.70)        | 3.81 (3.51 - 4.08)                        | 3.02 (2.75 - 3.28)                       | -                     | -                          | 4.10 (3.10 - 5.50)    |

Abbreviations: CKD: chronic kidney disease; BP: blood pressure; DALYs: disability-adjusted life years; CI: confidence interval

-: Data not reported/unavailable.

\* Results are expressed as percentage (%) of the population

**Figure S1:** Shortages of kidney failure providers in the North America and the Caribbean region.

| Country                      | Nephrologists | Transplant surgeons | Surgeons (HD access) | Surgeons (PD access) | Interventional radiologists (HD access) | Interventional radiologists (PD access) | Laboratory technicians | Dietitians  | Radiologists (ultrasound) | Vascular access coordinators | Counselors/psychologists | Transplant coordinators | Dialysis nurses | Dialysis technicians | TOTAL SHORTAGE |
|------------------------------|---------------|---------------------|----------------------|----------------------|-----------------------------------------|-----------------------------------------|------------------------|-------------|---------------------------|------------------------------|--------------------------|-------------------------|-----------------|----------------------|----------------|
| Total shortage →             | 4             | 7                   | 5                    | 3                    | 5                                       | 4                                       | 1                      | 0           | 0                         | 3                            | 3                        | 5                       | 3               | 4                    |                |
| Antigua & Barbuda            | No shortage   | Shortage            | Shortage             | No shortage          | Shortage                                | No shortage                             | No shortage            | No shortage | No shortage               | No shortage                  | Shortage                 | Shortage                | Shortage        | Shortage             | 7              |
| Bahamas                      | No shortage   | No shortage         | No shortage          | No shortage          | No shortage                             | No shortage                             | No shortage            | No shortage | No shortage               | No shortage                  | No shortage              | No shortage             | No shortage     | No shortage          | 0              |
| Canada                       | No shortage   | No shortage         | No shortage          | No shortage          | No shortage                             | No shortage                             | No shortage            | No shortage | No shortage               | No shortage                  | No shortage              | No shortage             | No shortage     | No shortage          | 0              |
| Cayman Islands               | Shortage      | Shortage            | No shortage          | No shortage          | No shortage                             | No shortage                             | No shortage            | No shortage | No shortage               | No shortage                  | No shortage              | No shortage             | No shortage     | No shortage          | 2              |
| Jamaica                      | Shortage      | Shortage            | No shortage          | No shortage          | Shortage                                | Shortage                                | No shortage            | No shortage | No shortage               | Shortage                     | Shortage                 | Shortage                | Shortage        | Shortage             | 9              |
| St. Kitts & Nevis            | Shortage      | Shortage            | Shortage             | Shortage             | Shortage                                | Shortage                                | No shortage            | No shortage | No shortage               | No shortage                  | No shortage              | Shortage                | Shortage        | Shortage             | 9              |
| St. Lucia                    | No shortage   | Shortage            | No shortage          | Shortage             | Shortage                                | Shortage                                | No shortage            | No shortage | No shortage               | No shortage                  | No shortage              | Shortage                | No shortage     | No shortage          | 5              |
| St. Vincent & the Grenadines | No shortage   | Shortage            | Shortage             | No shortage          | Shortage                                | No shortage                             | No shortage            | No shortage | No shortage               | Shortage                     | No shortage              | Shortage                | No shortage     | Shortage             | 6              |
| Trinidad & Tobago            | No shortage   | Shortage            | Shortage             | Shortage             | No shortage                             | Shortage                                | Shortage               | No shortage | No shortage               | Shortage                     | Shortage                 | No shortage             | No shortage     | No shortage          | 7              |
| United States                | Shortage      | No shortage         | Shortage             | No shortage          | No shortage                             | No shortage                             | No shortage            | No shortage | No shortage               | No shortage                  | No shortage              | No shortage             | No shortage     | No shortage          | 2              |

Abbreviations: ISN: International Society of Nephrology; GKHA: Global Kidney Health Atlas; HD: hemodialysis; PD: peritoneal dialysis

|             |
|-------------|
| No shortage |
| Shortage    |

**Figure S2:** Proportion of patients starting dialysis with different forms of vascular access and adequate education in the North America and the Caribbean region.

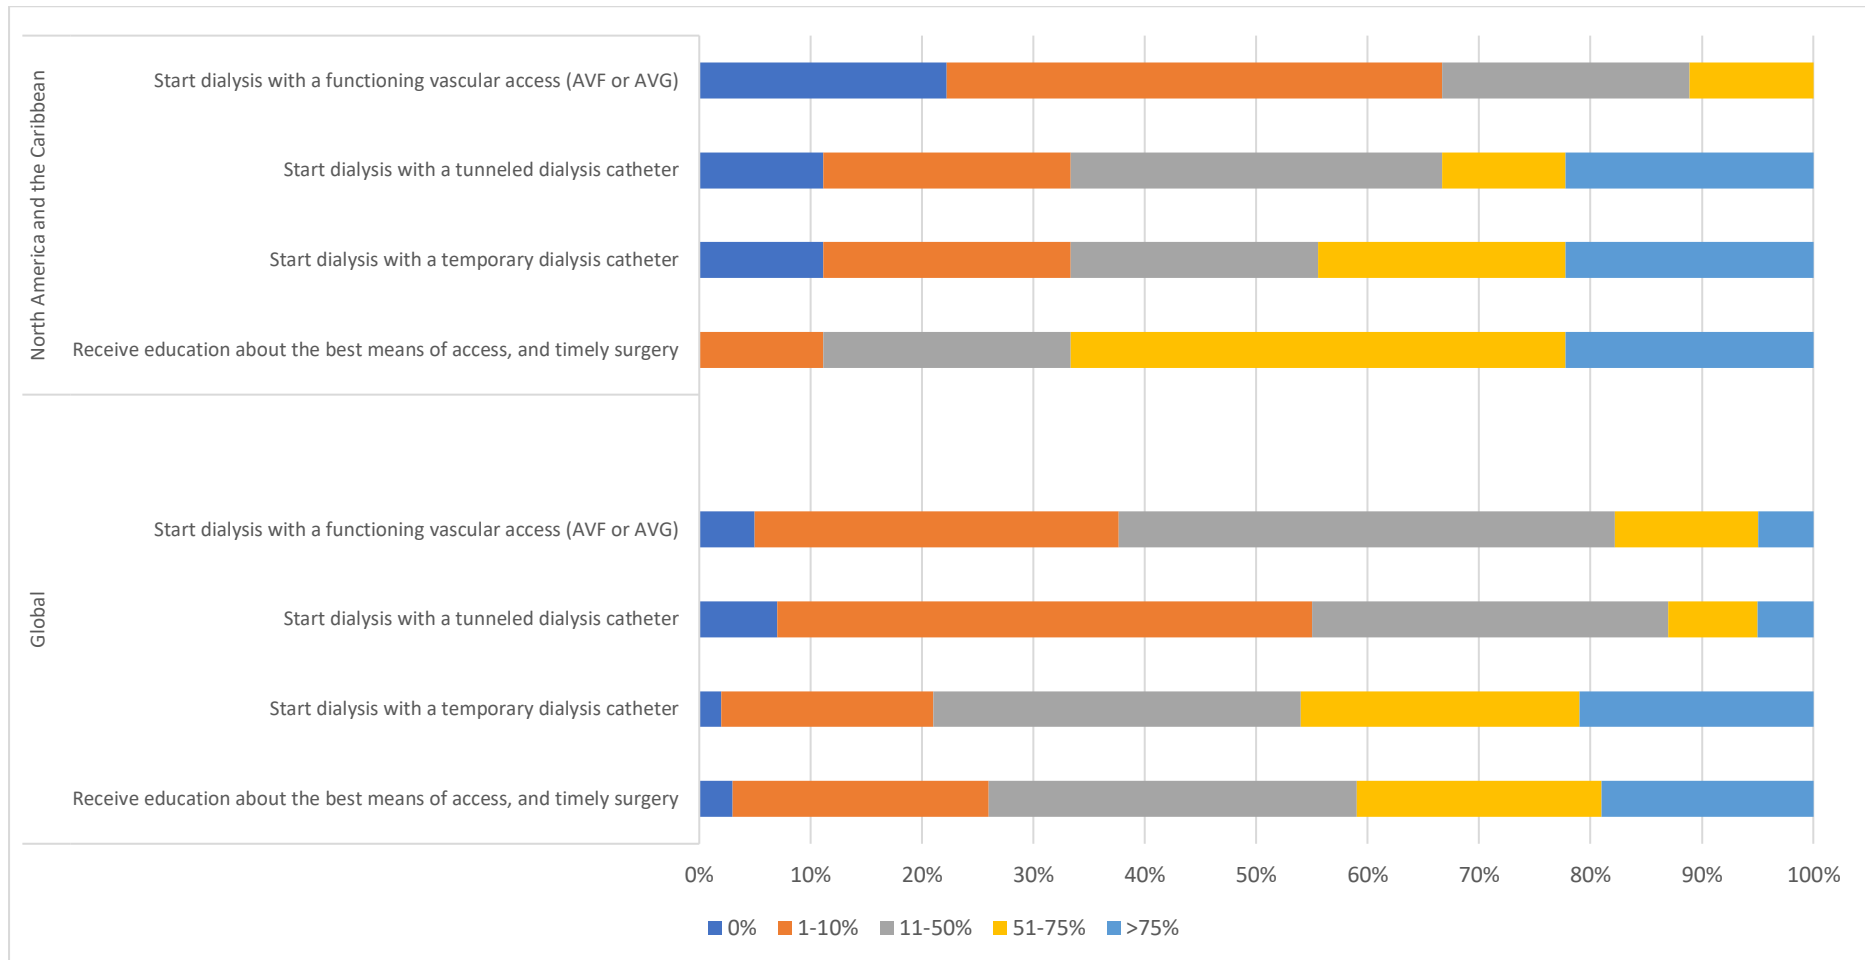

Abbreviations: AVF: arteriovenous fistula; AVG: arteriovenous graft

**Figure S3:** Availability of services to diagnose and treat complications of kidney failure in the North America and the Caribbean region.

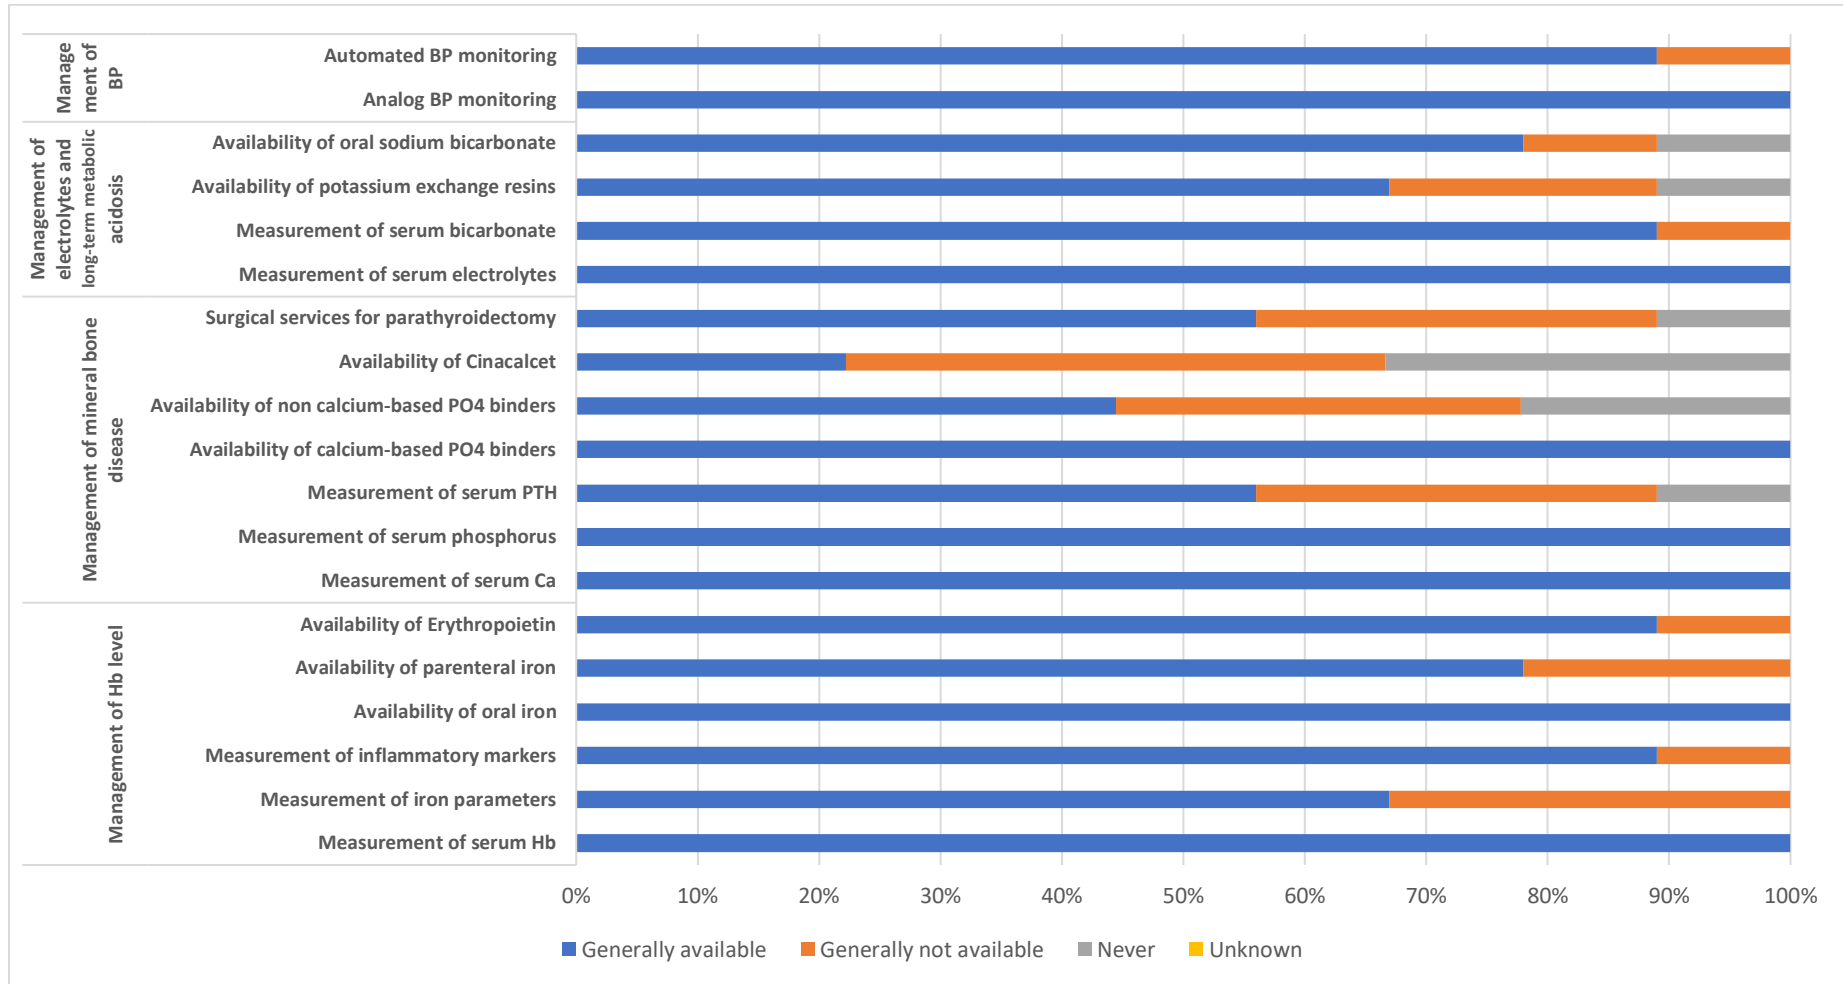

Abbreviations: BP: blood pressure; Hb: haemoglobin; PTH: parathyroid hormone; Ca: calcium; PO4: phosphate

**Figure S4:** Quality indicators monitored and reported by countries in the North America and the Caribbean region that participated in the ISN-GKHA survey.

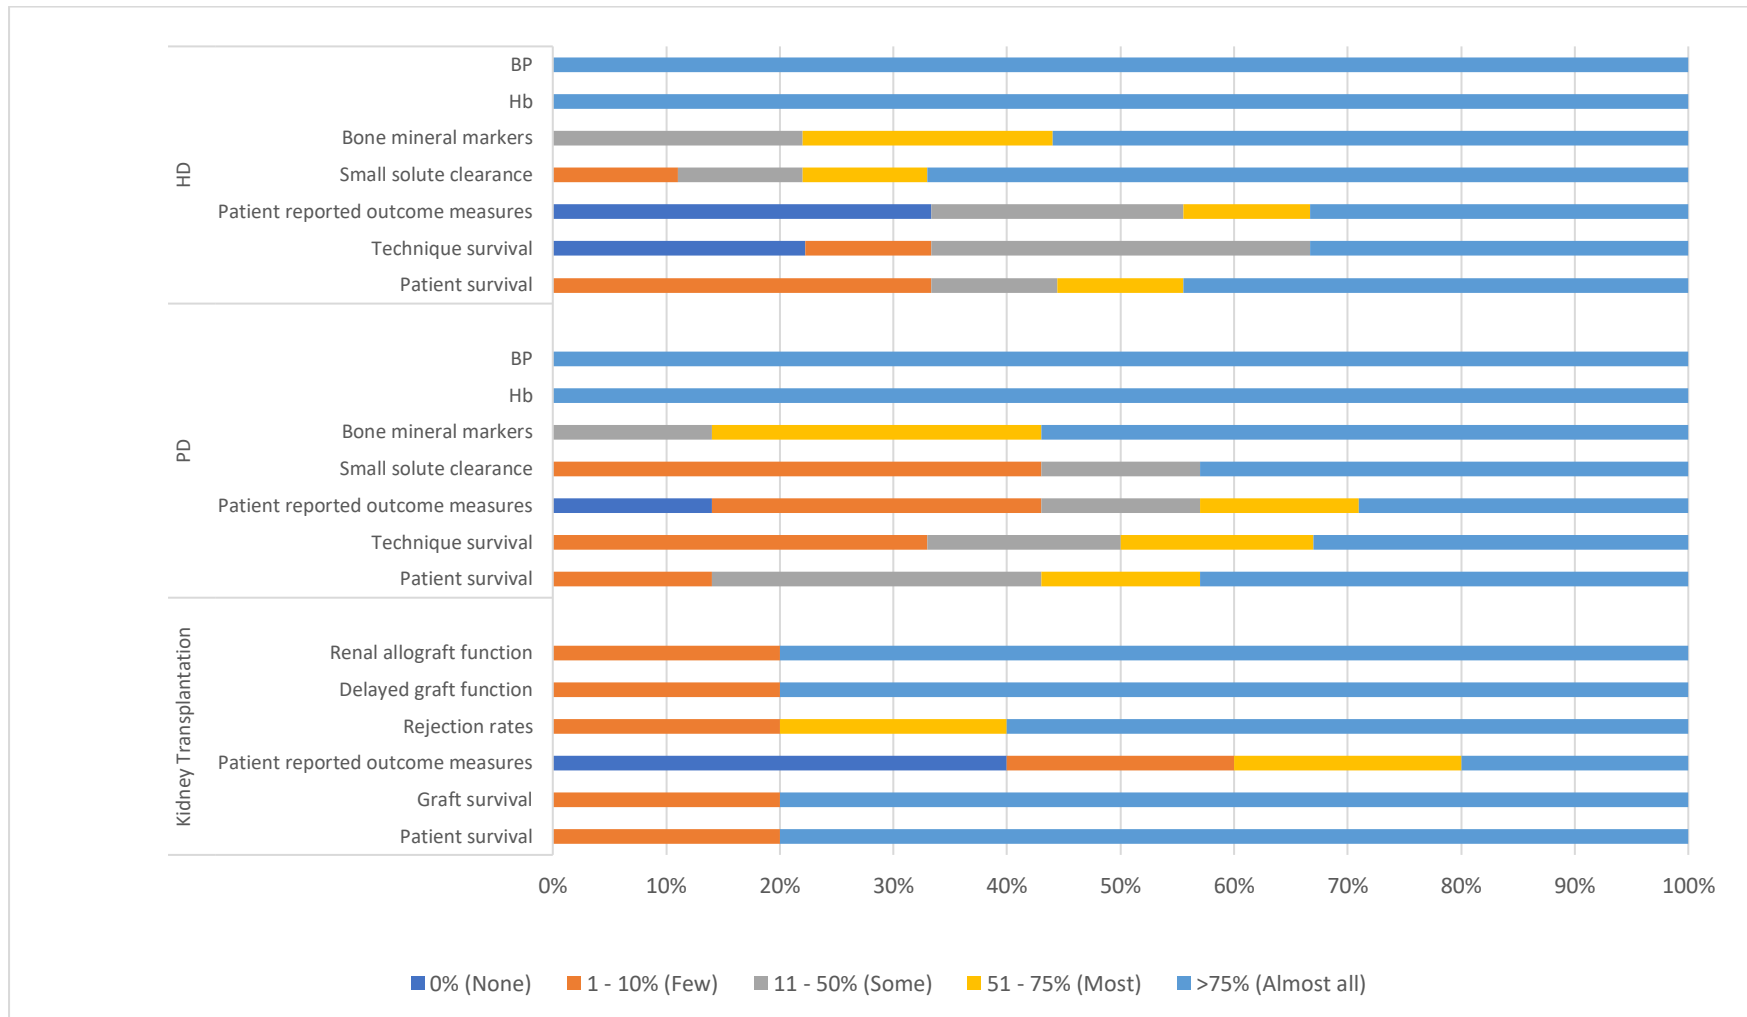

Abbreviations: HD: hemodialysis; PD: peritoneal dialysis; BP: blood pressure; Hb: hemoglobin; BP: blood pressure

**Figure S5:** Registry characteristics for countries in the North America and the Caribbean region that reported having one or more in the ISN-GKHA survey.

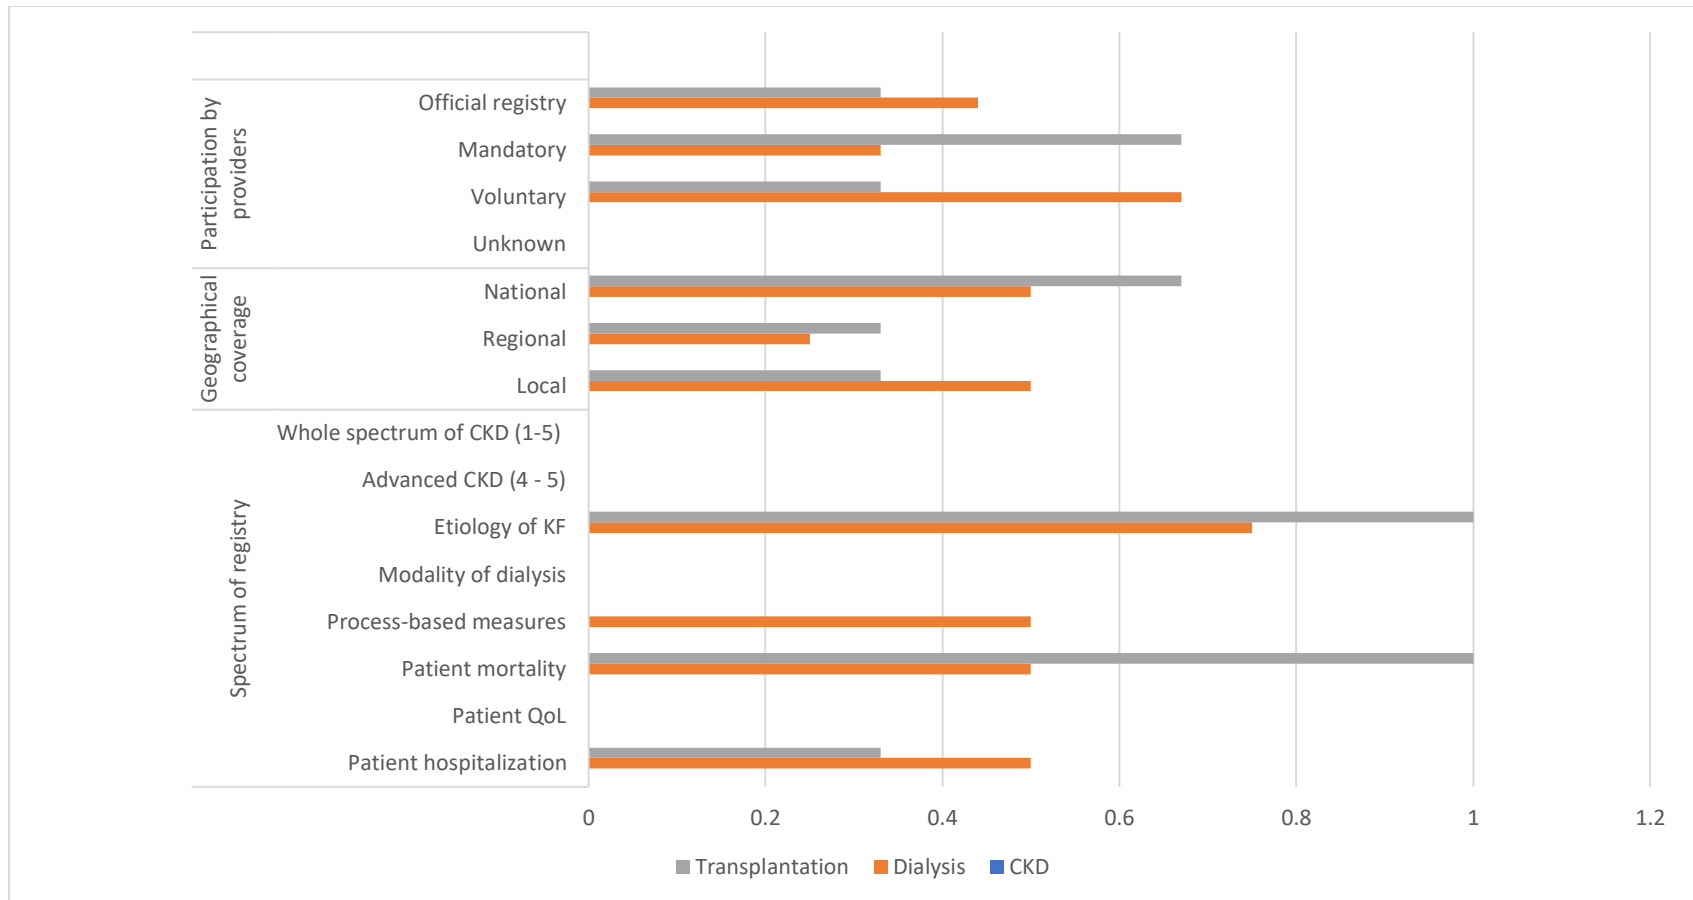

Abbreviations: CKD: chronic kidney disease; KF: kidney failure; QoL – quality of life

**Figure S6:** National strategies in the North America and the Caribbean region.

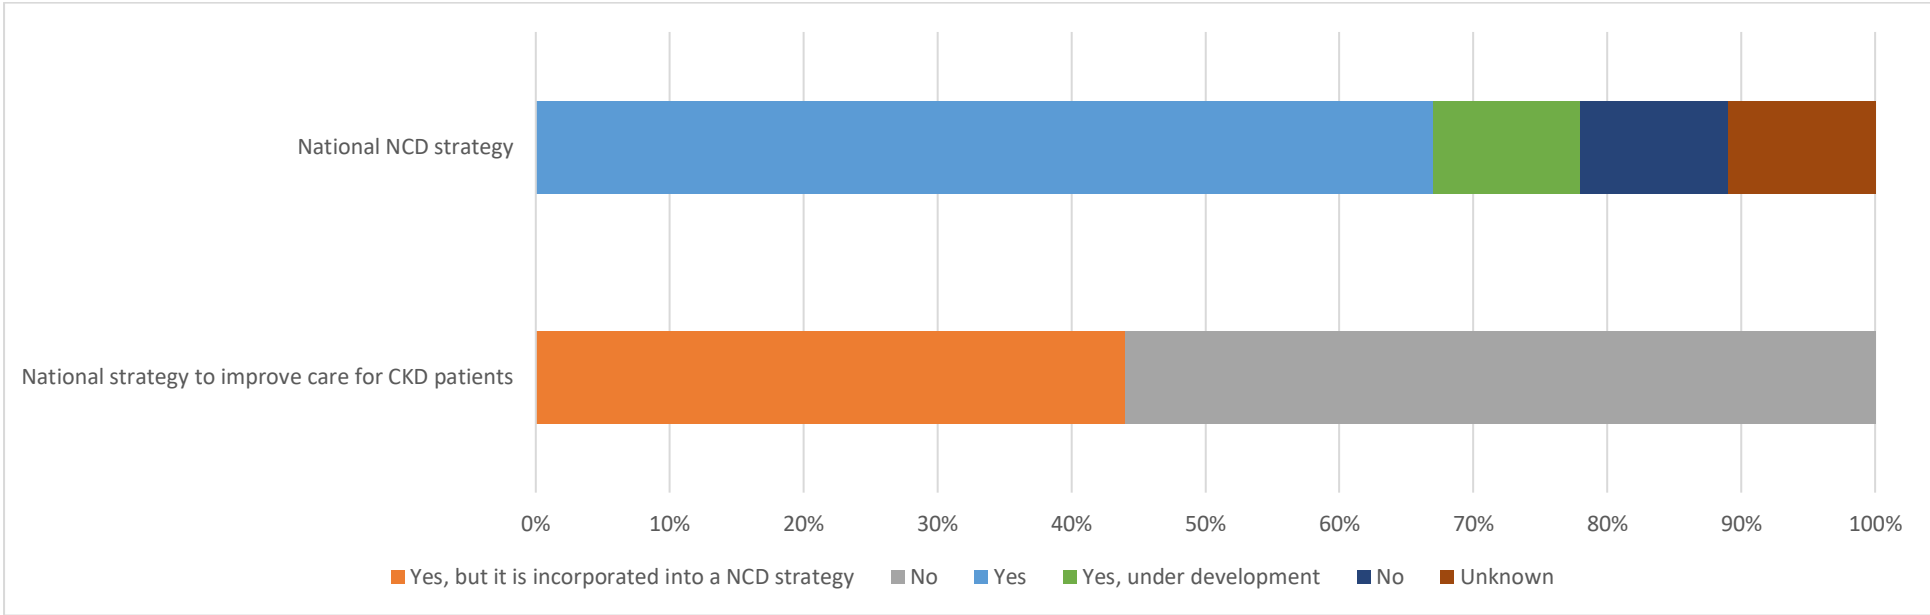

Abbreviations: NCD: non-communicable disease; CKD: chronic kidney disease



**Figure S7:** Populations covered by national non-communicable disease and chronic kidney disease strategies

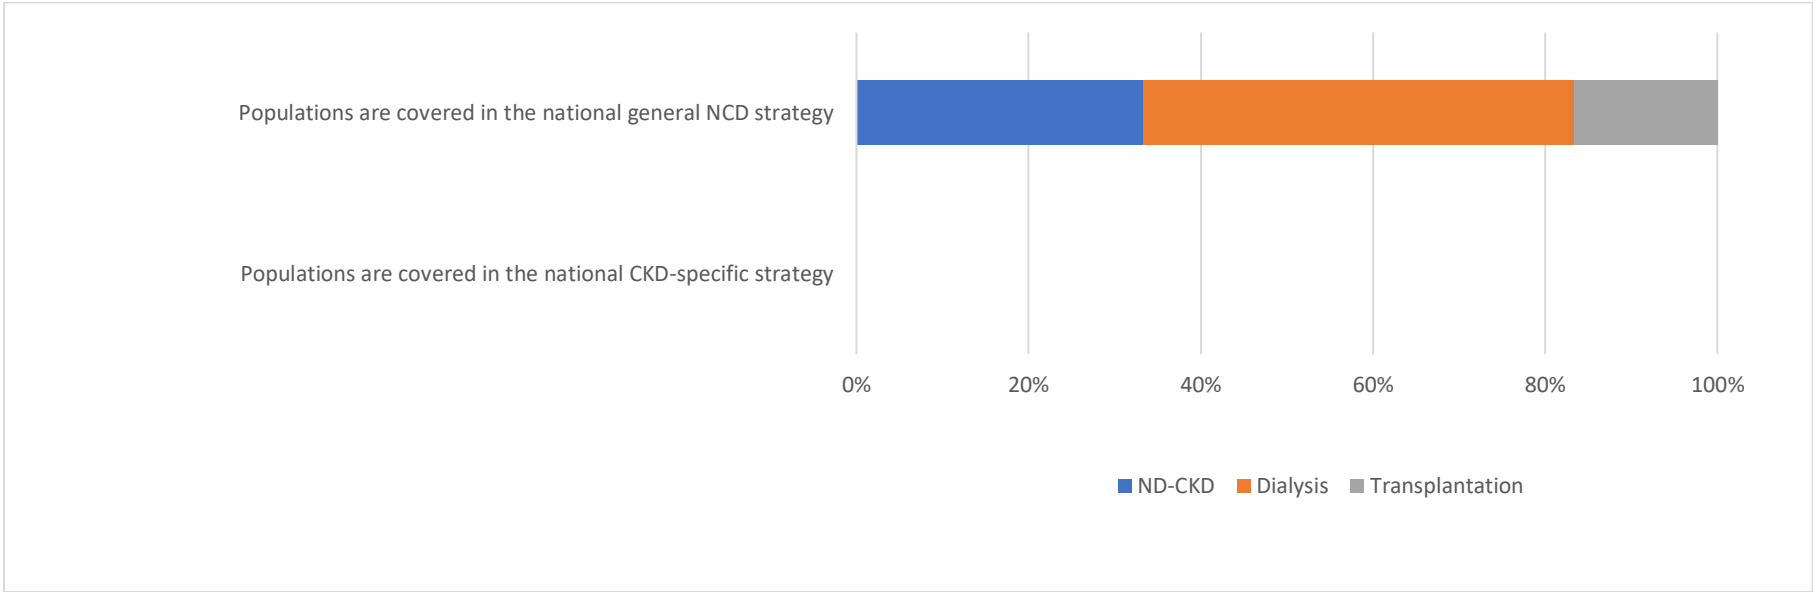

Abbreviations: NCD: non-communicable disease; ND-CKD: non-dialysis chronic kidney disease

### Supplementary References:

- S1. Institute for Health Metrics and Evaluation. Global Burden of Disease Study 2017 (GBD 2017) Data Resources. Available at: <http://ghdx.healthdata.org/gbd-2017>. Accessed August 6, 2020.
- S2. World Health Organization. The Global Health Observatory. Available at: <https://www.who.int/gho/en/>. Published 2019. Accessed: August 6, 2020.
- S3. Central Intelligence Agency. The World Factbook. Available at: <https://www.cia.gov/library/publications/the-world-factbook/>. Published 2019. Accessed July 16, 2020.

**Appendix:** Reference list for annual cost of kidney replacement therapy (for Table 1) (APA format).

- Adomakoh, S. A., Adi, C. N., Fraser, H. S., & Nicholson, G. D. (2004). Dialysis in Barbados: the cost of hemodialysis provision at the Queen Elizabeth Hospital. *Revista Panamericana de Salud Pública*, 16, 350-355.
- Barnieh, L., Yilmaz, S., McLaughlin, K., Hemmelgarn, B. R., Klarenbach, S., Manns, B. J., & Alberta Kidney Disease Network. (2014). The cost of kidney transplant over time. *Progress in Transplantation*, 24(3), 257-262.
- Berger, A., Edelsberg, J., Inglese, G. W., Bhattacharyya, S. K., & Oster, G. (2009). Cost comparison of peritoneal dialysis versus hemodialysis in end-stage renal disease. *The American journal of managed care*, 15(8), 509-518.
- Bruns, F. J., Seddon, P., Saul, M., & Zeidel, M. L. (1998). The cost of caring for end-stage kidney disease patients: an analysis based on hospital financial transaction records. *Journal of the American Society of Nephrology*, 9(5), 884-890.
- Coyte, P. C., Young, L. G., Tipper, B. L., Mitchell, V. M., Stoffman, P. R., Willumsen, J., & Geary, D. F. (1996). An economic evaluation of hospital-based hemodialysis and home-based peritoneal dialysis for pediatric patients. *American journal of kidney diseases*, 27(4), 557-565.
- Damien, P., Lanham, H. J., Parthasarathy, M., & Shah, N. L. (2016). Assessing key cost drivers associated with caring for chronic kidney disease patients. *BMC health services research*, 16(1), 690.
- De Vecchi, A. F., Dratwa, M., & Wiedemann, M. E. (1999). Healthcare systems and end-stage renal disease (ESRD) therapies—an international review: costs and reimbursement/funding of ESRD therapies. *Nephrology Dialysis Transplantation*, 14(suppl\_6), 31-41.

- Goeree, R., Manalich, J., Grootendorst, P., Beecroft, M. L., & Churchill, D. N. (1995). Cost analysis of dialysis treatments for end-stage renal disease (ESRD). *Clinical and investigative medicine. Medecine clinique et experimentale*, 18(6), 455.
- Klarenbach, S. W., Tonelli, M., Chui, B., & Manns, B. J. (2014). Economic evaluation of dialysis therapies. *Nature Reviews Nephrology*, 10(11), 644.
- Komenda, P., Gavaghan, M. B., Garfield, S. S., Poret, A. W., & Sood, M. M. (2012). An economic assessment model for in-center, conventional home, and more frequent home hemodialysis. *Kidney international*, 81(3), 307-313.
- Laupacis, A., Keown, P., Pus, N., Krueger, H., Ferguson, B., Wong, C., & Muirhead, N. (1996). A study of the quality of life and cost-utility of renal transplantation. *Kidney international*, 50(1), 235-242.
- Lee, H., Manns, B., Taub, K., Ghali, W. A., Dean, S., Johnson, D., & Donaldson, C. (2002). Cost analysis of ongoing care of patients with end-stage renal disease: the impact of dialysis modality and dialysis access. *American Journal of Kidney Diseases*, 40(3), 611-622.
- McMurray, S. D., & Miller, J. (1997). Impact of capitation on free-standing dialysis facilities: Can you survive? *American journal of kidney diseases*, 30(4), 542-548.
- Neil, N., Guest, S., Wong, L., Inglese, G., Bhattacharyya, S. K., Gehr, T., ... & Golper, T. (2009). The financial implications for Medicare of greater use of peritoneal dialysis. *Clinical therapeutics*, 31(4), 880-888.
- Rivara, M. B., & Mehrotra, R. (2014). The changing landscape of home dialysis in the United States. *Current opinion in nephrology and hypertension*, 23(6), 586.
- Shih, Y. C. T., Guo, A. M. Y., Just, P. M., & Mujais, S. (2005). Impact of initial dialysis modality and modality switches on Medicare expenditures of end-stage renal disease patients. *Kidney international*, 68(1), 319-329.
- van der Tol, A., Lameire, N., Morton, R. L., Van Biesen, W., & Vanholder, R. (2019). An international analysis of dialysis services reimbursement. *Clinical Journal of the American Society of Nephrology*, 14(1), 84-93.
